# Supplementary material
Source: MDPI journal article supplement (https://www.mdpi.com/2075-163X/13/9/1211)
Supplement: s1 [file s1]

# External reflection FTIR spectroscopy applied to archaeological pottery: a non-invasive investigation about provenance and firing temperature

Silvia Bruni, Margherita Longoni, Francesca De Filippi, Noemi Calore and Giovanna Bagnasco Gianni

## Supplementary Material

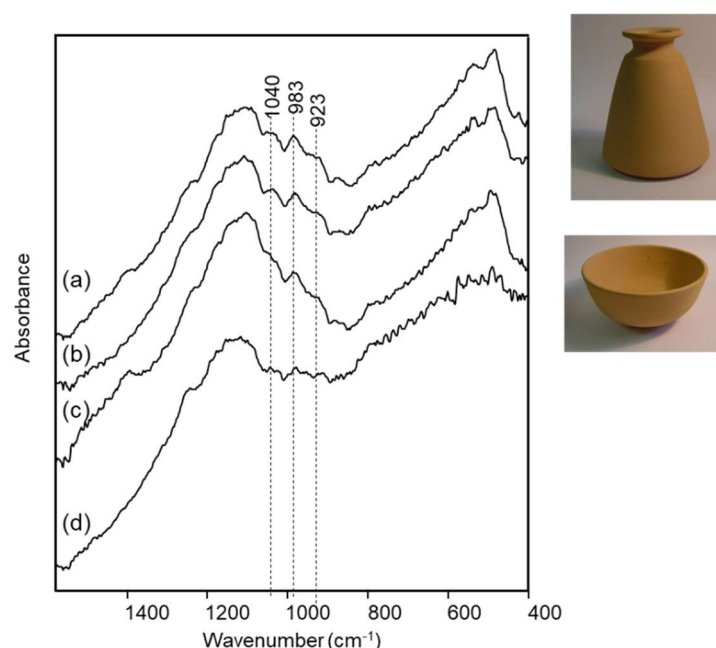

**Figure S1.** External reflection FTIR spectra acquired on areas with different radius of curvature of modern ceramic vessels (shown in the photographs): (a) wall and (b) bottom of the conical vase; (c) wall and (d) bottom of the bowl. The marked bands, assigned to the phases wollastonite  $\text{CaSiO}_3$  and gehlenite (in agreement with the results of XRD analysis, data not shown), can be reproducibly observed in the four spectra and the overall pattern is also similar.
